# Supplementary material
Source: publisher site journal article supplement (https://www.spandidos-publications.com/6976/downloadSupplementary)
Supplement: Supplementary file 1 [file downloadSupplementary]

Table SI. Overview of the densitometric analysis data.

| Sample repeat | Sample   | HYOU1   | $\beta$ -actin | Ratio | Relative expression level |
|---------------|----------|---------|----------------|-------|---------------------------|
| First         | HeLa     | 351.81  | 1403.60        | 0.25  | 1.00                      |
|               | HeLa/DDP | 1139.50 | 1245.80        | 0.91  | 3.65                      |
| Second        | HeLa     | 401.35  | 1184.00        | 0.34  | 1.35                      |
|               | HeLa/DDP | 1186.60 | 1124.90        | 1.05  | 4.21                      |
| Third         | HeLa     | 389.10  | 1304.80        | 0.30  | 1.19                      |
|               | HeLa/DDP | 1202.10 | 1271.60        | 0.95  | 3.77                      |

HYOU1, hypoxia-upregulated 1 gene; DDP, cisplatin; HeLa/DDP, DDP-resistant HeLa cells.
